# Supplementary material for: Structural and photophysical studies of trans-AB2C-substituted porphyrinligands and their zinc and copper complexes
Source: Royal Society of Chemistry journal article supplement (doi:10.1039/b713779f), 2007-11-09
Supplement: b713779f.pdf [file b713779f.pdf]

# Structural and Photophysical Studies of *trans*-AB<sub>2</sub>C-substituted Porphyrin Ligands and their Zinc and Copper Complexes

Katja Heinze,\* and Anja Reinhart

## Supplementary Information

- Cartesian Coordinates of DFT optimised ZnTPP, **2a**, **2b**, **2c** and **2d**
- Energies of frontier orbitals of ZnTPP, **2a**, **2b**, **2c** and **2d** in eV
- Normal coordinate structural decomposition (NSD) analysis for **1a**, **2a**, **3a** and CuTPP
- Full <sup>1</sup>H and <sup>13</sup>C NMR data tables.

## Cartesian Coordinates of ZnTPP

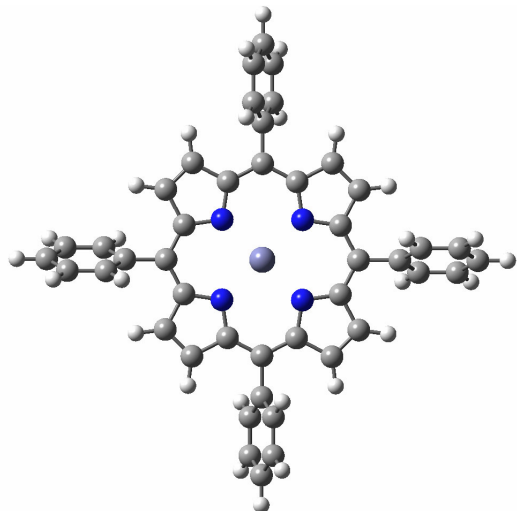

|    |             |             |             |
|----|-------------|-------------|-------------|
| Zn | 0.00010200  | 0.00006100  | -0.00009300 |
| N  | -2.06398100 | 0.12366700  | -0.00057100 |
| N  | 0.12562700  | 2.06395000  | 0.00234100  |
| N  | -0.12552700 | -2.06391700 | 0.00041400  |
| N  | 2.06407400  | -0.12361200 | -0.00238600 |
| C  | -2.96027300 | -0.94582500 | -0.00003000 |
| C  | -4.32256000 | -0.42758900 | 0.01299800  |
| C  | -4.23909800 | 0.94477000  | 0.01163000  |
| C  | -2.82407900 | 1.29399700  | 0.00878900  |
| H  | -5.21655300 | -1.03333200 | 0.02537600  |
| H  | -5.05304300 | 1.65456400  | 0.01052700  |
| C  | -2.31818400 | 2.61616000  | 0.00127000  |
| C  | -2.61798200 | -2.31976600 | 0.00012300  |
| C  | -0.42823000 | 4.32191500  | -0.01523200 |
| C  | 0.94421200  | 4.23985300  | -0.01572000 |
| C  | 1.29521900  | 2.82515400  | 0.00011700  |
| C  | -0.94481200 | 2.95922700  | -0.00714500 |
| H  | -1.03510700 | 5.21525700  | -0.01685900 |
| H  | 1.65267000  | 5.05474800  | -0.03102000 |
| C  | 2.61819800  | 2.31994800  | 0.00022200  |
| C  | 0.94482100  | -2.95928900 | -0.00753500 |
| C  | 0.42809200  | -4.32200300 | -0.01165500 |
| C  | -0.94433900 | -4.23977600 | -0.01430600 |
| C  | -1.29515000 | -2.82502700 | 0.00028100  |
| H  | 1.03494800  | -5.21536500 | -0.01082300 |
| H  | -1.65306900 | -5.05447500 | -0.02808100 |
| C  | 4.32265800  | 0.42744600  | 0.01446600  |
| C  | 4.23904200  | -0.94490100 | 0.01504900  |
| C  | 2.82406800  | -1.29402200 | 0.00848700  |
| C  | 2.96044000  | 0.94586000  | 0.00029900  |
| H  | 5.21681800  | 1.03288800  | 0.02833800  |
| H  | 5.05298900  | -1.65468100 | 0.01615000  |
| C  | 2.31818200  | -2.61621400 | 0.00078800  |
| C  | -3.31584900 | 3.74249300  | 0.00086700  |
| C  | -3.50594600 | 4.53691900  | -1.15229600 |
| C  | -4.44061200 | 5.58928800  | -1.15443600 |
| C  | -5.19643600 | 5.86767300  | 0.00103500  |
| C  | -5.01182600 | 5.08367200  | 1.15652800  |
| C  | -4.08075500 | 4.02813100  | 1.15430800  |
| H  | -2.92767800 | 4.32195700  | -2.04771800 |
| H  | -4.57834200 | 6.18640500  | -2.05295500 |
| H  | -5.91710400 | 6.68209600  | 0.00105800  |
| H  | -5.58741100 | 5.29314800  | 2.05522900  |
| H  | -3.93705300 | 3.42838800  | 2.04987900  |
| C  | -3.74408100 | -3.31692600 | -0.00078900 |
| C  | -4.00240000 | -4.11452500 | 1.13712300  |

|   |             |             |             |
|---|-------------|-------------|-------------|
| C | -5.05827000 | -5.04504200 | 1.13874800  |
| C | -5.87014300 | -5.19721200 | -0.00214300 |
| C | -5.61924300 | -4.40911100 | -1.14223200 |
| C | -4.56685700 | -3.47463500 | -1.13914300 |
| H | -3.38162600 | -3.99584100 | 2.02193900  |
| H | -5.24639000 | -5.64546800 | 2.02583900  |
| H | -6.23777600 | -4.52159600 | -2.02970100 |
| H | -4.37318900 | -2.87179000 | -2.02311700 |
| C | 3.31577900  | -3.74260400 | 0.00120000  |
| C | 4.08062700  | -4.02798600 | 1.15473200  |
| C | 5.01149600  | -5.08370200 | 1.15731700  |
| C | 5.19601600  | -5.86810300 | 0.00208000  |
| C | 4.44030100  | -5.58993800 | -1.15351300 |
| C | 3.50582300  | -4.53740400 | -1.15173200 |
| H | 3.93696300  | -3.42799300 | 2.05014400  |
| H | 5.58699200  | -5.29301500 | 2.05611300  |
| H | 5.91656900  | -6.68262700 | 0.00238400  |
| H | 4.57796000  | -6.18735700 | -2.05184200 |
| H | 2.92760300  | -4.32262500 | -2.04722700 |
| C | 3.74414000  | 3.31699500  | -0.00072100 |
| C | 3.99530100  | 4.12303100  | 1.13293300  |
| C | 5.05110400  | 5.05356300  | 1.13448400  |
| C | 5.87023700  | 5.19751300  | -0.00227100 |
| C | 5.62658500  | 4.40107500  | -1.13814000 |
| C | 4.57426800  | 3.46660200  | -1.13494100 |
| H | 3.36910800  | 4.01070200  | 2.01474300  |
| H | 5.23354700  | 5.66039500  | 2.01839100  |
| H | 6.25066900  | 4.50717000  | -2.02249800 |
| H | 4.38614000  | 2.85754600  | -2.01583700 |
| H | 6.68478600  | 5.91803100  | -0.00290000 |
| H | -6.68473300 | -5.91768700 | -0.00269000 |

## Cartesian Coordinates of 2a

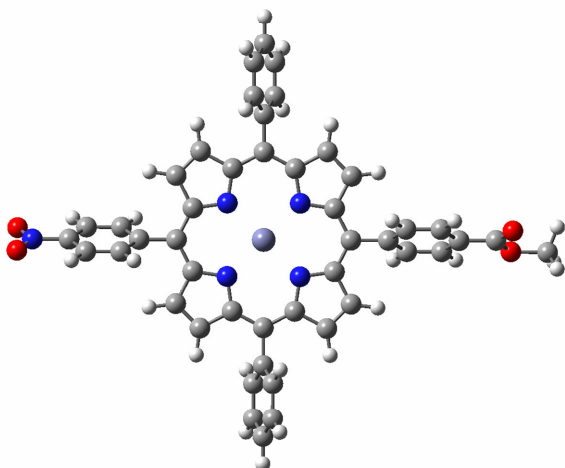

|    |             |             |             |
|----|-------------|-------------|-------------|
| Zn | -0.23858600 | 0.00883000  | 0.02310900  |
| N  | 1.23702800  | -1.43991800 | 0.04131900  |
| N  | -1.68899400 | -1.46647200 | 0.01021400  |
| N  | 1.21031100  | 1.48414700  | 0.04148500  |
| N  | -1.71551800 | 1.45742700  | -0.00120100 |
| C  | 2.61474100  | -1.22137700 | 0.05482000  |
| C  | 3.30219400  | -2.50686700 | 0.07357900  |
| C  | 2.33870200  | -3.48688800 | 0.05883400  |
| C  | 1.04235200  | -2.82138200 | 0.04578200  |
| H  | 4.37327800  | -2.64109300 | 0.09907700  |
| H  | 2.48838200  | -4.55616400 | 0.05541100  |
| C  | -0.20663900 | -3.48759500 | 0.02548100  |
| C  | 3.25622100  | 0.04060400  | 0.06899500  |
| C  | -2.75015000 | -3.53480100 | -0.00825600 |
| C  | -3.73235700 | -2.57376000 | -0.02234700 |
| C  | -3.06987100 | -1.27447700 | -0.00242800 |
| C  | -1.46688200 | -2.84494800 | 0.00531700  |
| H  | -2.87981300 | -4.60669300 | -0.00594000 |
| H  | -4.79992500 | -2.73329800 | -0.05096100 |
| C  | -3.73304900 | -0.02297200 | -0.02048500 |
| C  | 0.99084600  | 2.86184800  | 0.03186700  |
| C  | 2.27481600  | 3.55077200  | 0.05370500  |
| C  | 3.25595000  | 2.58841300  | 0.06519900  |
| C  | 2.59165500  | 1.29064800  | 0.06544500  |
| H  | 2.40510000  | 4.62256300  | 0.06175000  |
| H  | 4.32471000  | 2.74207200  | 0.06957800  |
| C  | -3.77881600 | 2.52744100  | -0.01986300 |
| C  | -2.81415300 | 3.50614700  | -0.01051600 |
| C  | -1.51861800 | 2.83972000  | 0.00824100  |
| C  | -3.09256200 | 1.24041900  | -0.02262200 |
| H  | -4.84946100 | 2.66766000  | -0.01717300 |
| H  | -2.96307500 | 4.57552400  | -0.01657100 |
| C  | -0.27016800 | 3.50525400  | 0.01955100  |
| C  | -0.19256900 | -4.99229400 | 0.02509700  |
| C  | -0.57454900 | -5.71623000 | -1.12703800 |
| C  | -0.55837000 | -7.12348000 | -1.12959000 |
| C  | -0.16619600 | -7.82942400 | 0.02435200  |
| C  | 0.21299200  | -7.11686300 | 1.17858700  |
| C  | 0.20308900  | -5.70956500 | 1.17677200  |
| H  | -0.87187900 | -5.17533000 | -2.02226100 |
| H  | -0.84864500 | -7.66433300 | -2.02725400 |
| H  | -0.15633400 | -8.91675000 | 0.02416500  |
| H  | 0.51316500  | -7.65265300 | 2.07602200  |
| H  | 0.49080000  | -5.16370400 | 2.07211200  |
| C  | 4.75921400  | 0.05442200  | 0.09075900  |
| C  | 5.46062400  | 0.50470100  | 1.23389700  |
| C  | 6.86261800  | 0.51457600  | 1.25748900  |

|   |              |             |             |
|---|--------------|-------------|-------------|
| C | 7.59423700   | 0.08043200  | 0.13046000  |
| C | 6.90470500   | -0.36724400 | -1.01730700 |
| C | 5.50152500   | -0.38230200 | -1.03117000 |
| H | 4.90193800   | 0.83293600  | 2.10621100  |
| H | 7.40520600   | 0.85189000  | 2.13593400  |
| H | 7.47037600   | -0.69546800 | -1.88267900 |
| H | 4.97355600   | -0.72040000 | -1.91878800 |
| C | -0.28339200  | 5.00990100  | 0.01915800  |
| C | -0.70918500  | 5.72721300  | 1.16002900  |
| C | -0.71851300  | 7.13451300  | 1.16180300  |
| C | -0.30836900  | 7.84700300  | 0.01818800  |
| C | 0.11445700   | 7.14101400  | -1.12487200 |
| C | 0.13004600   | 5.73378900  | -1.12209800 |
| H | -1.02033800  | 5.18136500  | 2.04751300  |
| H | -1.04229600  | 7.67034000  | 2.05096100  |
| H | -0.31792500  | 8.93432800  | 0.01781900  |
| H | 0.42903700   | 7.68188100  | -2.01429500 |
| H | 0.45152000   | 5.19284700  | -2.00890000 |
| C | -5.23435500  | -0.03674600 | -0.03860100 |
| C | -5.96536500  | -0.52912100 | 1.06956900  |
| C | -7.36711800  | -0.54238500 | 1.06463800  |
| C | -8.04162000  | -0.06306200 | -0.07210800 |
| C | -7.34929700  | 0.42915800  | -1.19250900 |
| C | -5.94780700  | 0.44222500  | -1.16396000 |
| H | -5.42783400  | -0.88622200 | 1.94303500  |
| H | -7.93562400  | -0.90823300 | 1.91227700  |
| H | -7.90415700  | 0.78450800  | -2.05355700 |
| H | -5.39644500  | 0.80957600  | -2.02446700 |
| C | 9.08015500   | 0.11170300  | 0.19763300  |
| O | 9.74516800   | 0.49445100  | 1.17988000  |
| O | 9.67585500   | -0.33798400 | -0.96826800 |
| N | -9.51568600  | -0.07707700 | -0.08973600 |
| C | 11.14853200  | -0.34402600 | -0.99788000 |
| H | 11.40843000  | -0.71772400 | -1.98929600 |
| H | 11.53361700  | 0.66897500  | -0.84434900 |
| H | 11.53892900  | -1.00066400 | -0.21395300 |
| O | -10.11273500 | 0.36689800  | -1.13189900 |
| O | -10.12890600 | -0.53261700 | 0.93793200  |

## Cartesian Coordinates of 2b

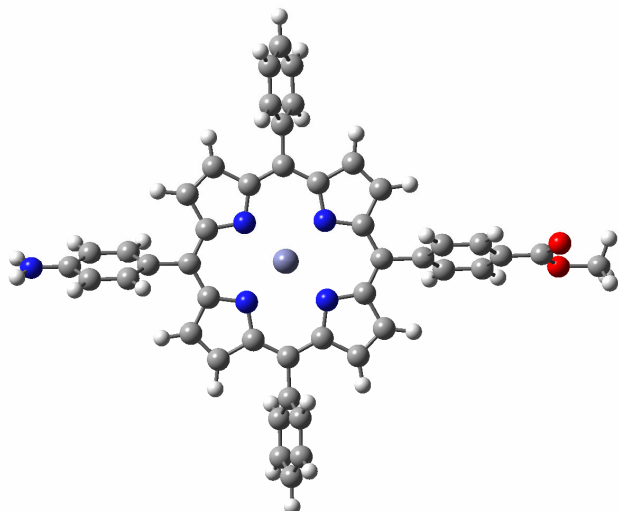

|    |             |             |             |
|----|-------------|-------------|-------------|
| Zn | -0.60316900 | 0.00398200  | 0.01897800  |
| N  | 0.87971000  | -1.43855300 | 0.04456300  |
| N  | -2.04727200 | -1.47597300 | 0.00888700  |
| N  | 0.84223200  | 1.48406900  | 0.03563100  |
| N  | -2.08449900 | 1.44628000  | -0.01394300 |
| C  | 2.25641700  | -1.21553700 | 0.06139400  |
| C  | 2.94759100  | -2.49916500 | 0.08927900  |
| C  | 1.98715400  | -3.48235000 | 0.07617000  |
| C  | 0.68838500  | -2.82157700 | 0.05458700  |
| H  | 4.01900700  | -2.63032200 | 0.11968300  |
| H  | 2.14057200  | -4.55121200 | 0.07908200  |
| C  | -0.55743700 | -3.49080700 | 0.02987100  |
| C  | 2.89375200  | 0.04882500  | 0.07117200  |
| C  | -3.10204100 | -3.54661600 | -0.02866100 |
| C  | -4.08699300 | -2.58760500 | -0.05294300 |
| C  | -3.43025200 | -1.28720800 | -0.01949400 |
| C  | -1.82146200 | -2.85265900 | 0.00186400  |
| H  | -3.22803500 | -4.61903100 | -0.03247800 |
| H  | -5.15449100 | -2.74217000 | -0.09725600 |
| C  | -4.10562700 | -0.04097900 | -0.03172300 |
| C  | 0.61603100  | 2.86174400  | 0.01974800  |
| C  | 1.89755300  | 3.55554300  | 0.03770600  |
| C  | 2.88275200  | 2.59727100  | 0.05409600  |
| C  | 2.22409900  | 1.29636000  | 0.06103100  |
| H  | 2.02380000  | 4.62795700  | 0.04007700  |
| H  | 3.95088600  | 2.75577500  | 0.05728900  |
| C  | -4.15292700 | 2.50532300  | -0.01124100 |
| C  | -3.19255400 | 3.48923000  | -0.00808400 |
| C  | -1.89425700 | 2.82831600  | -0.00131200 |
| C  | -3.46242200 | 1.22219600  | -0.02514700 |
| H  | -5.22483400 | 2.63255500  | 0.00294600  |
| H  | -3.34590000 | 4.55809200  | -0.00830200 |
| C  | -0.64675300 | 3.49879100  | 0.00720700  |
| C  | -0.53819800 | -4.99561800 | 0.03160800  |
| C  | -0.90569100 | -5.72339900 | -1.12289600 |
| C  | -0.88379700 | -7.13060200 | -1.12358400 |
| C  | -0.49968800 | -7.83377300 | 0.03484100  |
| C  | -0.13483600 | -7.11788200 | 1.19162700  |
| C  | -0.15119800 | -5.71054700 | 1.18772700  |
| H  | -1.19703000 | -5.18440600 | -2.02119600 |
| H  | -1.16307700 | -7.67369600 | -2.02354300 |
| H  | -0.48482600 | -8.92117300 | 0.03602000  |
| H  | 0.15940100  | -7.65110100 | 2.09270600  |
| H  | 0.12553500  | -5.16178600 | 2.08474000  |
| C  | 4.39636900  | 0.06823800  | 0.09493600  |

|   |              |             |             |
|---|--------------|-------------|-------------|
| C | 5.09589800   | 0.53798200  | 1.23180700  |
| C | 6.49769600   | 0.55354200  | 1.25721500  |
| C | 7.23288100   | 0.10493900  | 0.13793800  |
| C | 6.54593200   | -0.36256900 | -1.00372600 |
| C | 5.14298800   | -0.38248600 | -1.01900900 |
| H | 4.53454000   | 0.87684300  | 2.09827300  |
| H | 7.03762900   | 0.90600500  | 2.13138200  |
| H | 7.11366700   | -0.70176900 | -1.86354100 |
| H | 4.61704100   | -0.73531800 | -1.90203100 |
| C | -0.66604500  | 5.00354400  | 0.00479600  |
| C | -1.08807800  | 5.72180000  | 1.14655100  |
| C | -1.10235000  | 7.12908800  | 1.14656300  |
| C | -0.70036600  | 7.84170000  | 0.00004500  |
| C | -0.28125300  | 7.13526000  | -1.14409900 |
| C | -0.26148400  | 5.72799400  | -1.13933700 |
| H | -1.39324100  | 5.17564000  | 2.03588600  |
| H | -1.42331300  | 7.66495500  | 2.03688100  |
| H | -0.71310900  | 8.92912200  | -0.00160000 |
| H | 0.02742800   | 7.67579500  | -2.03594300 |
| H | 0.05717300   | 5.18633900  | -2.02670700 |
| C | -5.60655400  | -0.06031600 | -0.05268400 |
| C | -6.34838700  | -0.56345700 | 1.04084800  |
| C | -7.75049700  | -0.58002500 | 1.03186700  |
| C | -8.46923600  | -0.09722100 | -0.09183000 |
| C | -7.73273700  | 0.40428800  | -1.19564600 |
| C | -6.33091100  | 0.42394700  | -1.16626800 |
| H | -5.81896700  | -0.93088900 | 1.91691200  |
| H | -8.29250300  | -0.96387300 | 1.89443200  |
| H | -8.26070300  | 0.77438600  | -2.07281000 |
| H | -5.78746900  | 0.80532100  | -2.02767700 |
| C | 8.71768000   | 0.14235500  | 0.20627900  |
| O | 9.38221600   | 0.54212700  | 1.18245300  |
| O | 9.31732300   | -0.32326200 | -0.95257100 |
| N | -9.86364300  | -0.11515700 | -0.11085000 |
| C | 10.78946300  | -0.32390100 | -0.97898400 |
| H | 11.05314700  | -0.71375100 | -1.96325900 |
| H | 11.17072000  | 0.69305000  | -0.84237000 |
| H | 11.18138700  | -0.96506500 | -0.18300700 |
| H | -10.38776200 | -0.47302200 | 0.67279500  |
| H | -10.37526000 | 0.22982400  | -0.90841500 |

## Cartesian Coordinates of 2c

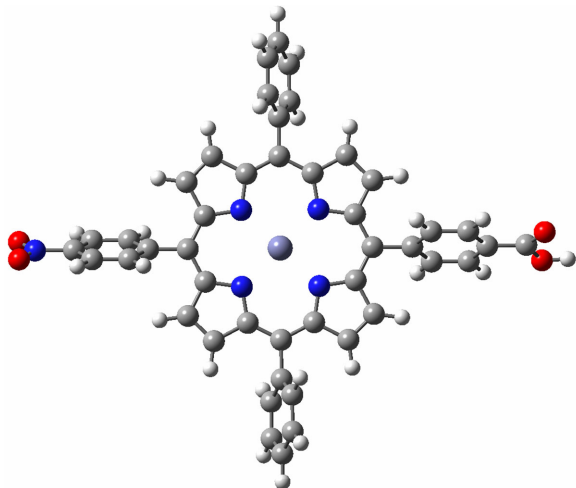

|    |             |             |             |
|----|-------------|-------------|-------------|
| Zn | 0.00821000  | 0.00170600  | -0.00450800 |
| N  | -1.45667300 | -1.45822200 | -0.00605800 |
| N  | 1.46972900  | -1.46260200 | -0.00558100 |
| N  | -1.45214400 | 1.46606600  | -0.00898800 |
| N  | 1.47421700  | 1.46150400  | 0.00321500  |
| C  | -2.83597500 | -1.25024600 | -0.00440600 |
| C  | -3.51375300 | -2.54108700 | -0.01524400 |
| C  | -2.54267800 | -3.51363000 | -0.01079600 |
| C  | -1.25137700 | -2.83825700 | -0.01211000 |
| H  | -4.58389700 | -2.68427300 | -0.02925000 |
| H  | -2.68422500 | -4.58398900 | -0.00533400 |
| C  | 0.00269200  | -3.49496100 | -0.00462600 |
| C  | -3.48672100 | 0.00705500  | -0.01242700 |
| C  | 2.54677900  | -3.52275200 | 0.00282100  |
| C  | 3.52173400  | -2.55428400 | 0.00675200  |
| C  | 2.84919100  | -1.26011400 | -0.00713100 |
| C  | 1.25820200  | -2.84265600 | 0.00228300  |
| H  | 2.68452200  | -4.59361800 | -0.00049100 |
| H  | 4.59071200  | -2.70567400 | 0.02463200  |
| C  | 3.50296600  | -0.00365100 | 0.00314700  |
| C  | -1.24267500 | 2.84546900  | -0.00246300 |
| C  | -2.53187500 | 3.52481000  | -0.01058400 |
| C  | -3.50593700 | 2.55528200  | -0.01070100 |
| C  | -2.83207100 | 1.26234400  | -0.01759200 |
| H  | -2.67016500 | 4.59558400  | -0.01767400 |
| H  | -4.57567100 | 2.70191100  | -0.00288100 |
| C  | 3.52957300  | 2.54693000  | -0.00028400 |
| C  | 2.55756400  | 3.51836200  | -0.00047300 |
| C  | 1.26693400  | 2.84219400  | -0.00549400 |
| C  | 2.85302800  | 1.25481800  | 0.01066200  |
| H  | 4.59906600  | 2.69508300  | -0.01377500 |
| H  | 2.69852300  | 4.58880900  | 0.00336200  |
| C  | 0.01340800  | 3.49834800  | -0.00422100 |
| C  | 0.00006900  | -4.99974400 | -0.00360700 |
| C  | 0.39928300  | -5.72024800 | 1.14482600  |
| C  | 0.39385600  | -7.12756800 | 1.14794100  |
| C  | -0.00466600 | -7.83688600 | -0.00174700 |
| C  | -0.40096600 | -7.12770000 | -1.15230200 |
| C  | -0.40177400 | -5.72037900 | -1.15102900 |
| H  | 0.70156900  | -5.17680100 | 2.03684500  |
| H  | 0.69733400  | -7.66586800 | 2.04275100  |
| H  | -0.00631500 | -8.92424500 | -0.00111100 |
| H  | -0.70616300 | -7.66612900 | -2.04644400 |
| H  | -0.70260100 | -5.17710000 | -2.04362900 |
| C  | -4.98978700 | 0.00950300  | -0.01624700 |
| C  | -5.70792200 | 0.45875700  | -1.14992800 |
| C  | -7.10965800 | 0.45860300  | -1.15724300 |



|   |              |             |             |
|---|--------------|-------------|-------------|
| C | -7.82311500  | 0.01464000  | -0.02191400 |
| C | -7.11786400  | -0.43233100 | 1.11663400  |
| C | -5.71488100  | -0.43688700 | 1.11331500  |
| H | -5.16162000  | 0.79390300  | -2.02730000 |
| H | -7.66484700  | 0.79502400  | -2.02814400 |
| H | -7.67099600  | -0.76761400 | 1.98751400  |
| H | -5.17349200  | -0.77385400 | 1.99308700  |
| C | 0.01534100   | 5.00311300  | -0.00551900 |
| C | 0.42201000   | 5.72218700  | -1.15222600 |
| C | 0.42064600   | 7.12950900  | -1.15565700 |
| C | 0.01882400   | 7.84023000  | -0.00799300 |
| C | -0.38488100  | 7.13246000  | 1.14085600  |
| C | -0.38978400  | 5.72515300  | 1.13986400  |
| H | 0.72671200   | 5.17769200  | -2.04277800 |
| H | 0.72967300   | 7.66671800  | -2.04921200 |
| H | 0.02016900   | 8.92758600  | -0.00894000 |
| H | -0.69279400  | 7.67200100  | 2.03339800  |
| H | -0.69643100  | 5.18292000  | 2.03112300  |
| C | 5.00451600   | -0.00597900 | 0.00628800  |
| C | 5.72825000   | -0.49231400 | -1.10923900 |
| C | 7.13007200   | -0.49471700 | -1.11808000 |
| C | 7.81191400   | -0.01048600 | 0.01215000  |
| C | 7.12691800   | 0.47597900  | 1.13951000  |
| C | 5.72514700   | 0.47808400  | 1.12480900  |
| H | 5.18498700   | -0.85345600 | -1.97749600 |
| H | 7.69304000   | -0.85596900 | -1.97137100 |
| H | 7.68748000   | 0.83545800  | 1.99513200  |
| H | 5.17943400   | 0.84101200  | 1.99078300  |
| C | -9.30493300  | 0.03443800  | -0.06731300 |
| O | -9.99914100  | 0.41263300  | -1.02869500 |
| O | -9.89135000  | -0.42579600 | 1.10862400  |
| N | 9.28627500   | -0.01292100 | 0.01526500  |
| O | 9.88991100   | 0.43534400  | 1.05171700  |
| O | 9.89280200   | -0.46318300 | -1.01861900 |
| H | -10.87163000 | -0.39341600 | 1.03368700  |

## Cartesian Coordinates of 2d

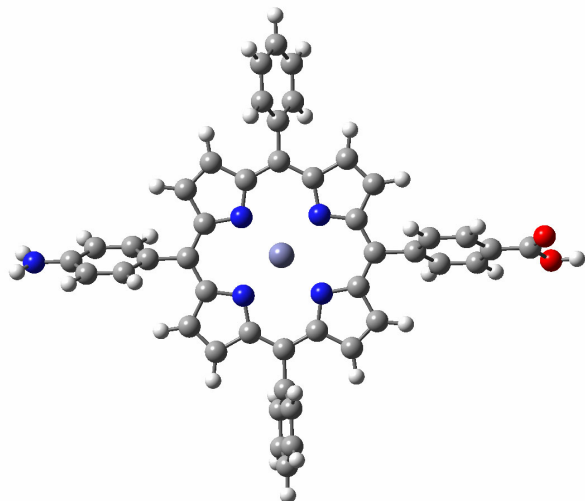

|    |             |             |             |
|----|-------------|-------------|-------------|
| Zn | 0.37175200  | 0.00103100  | -0.00386100 |
| C  | -2.47525600 | -1.24823100 | -0.00996400 |
| C  | -3.15330900 | -2.53912900 | -0.02928300 |
| C  | -2.18259500 | -3.51215300 | -0.02754700 |
| C  | -0.89064800 | -2.83787800 | -0.02209800 |
| N  | -1.09633400 | -1.45681900 | -0.01026100 |
| H  | -4.22349600 | -2.68210200 | -0.04707300 |
| H  | -2.32486200 | -4.58254600 | -0.02827100 |
| C  | 0.36213600  | -3.49414100 | -0.01222100 |
| C  | -3.12541700 | 0.00971900  | -0.01297500 |
| C  | 2.90767600  | -3.52356200 | 0.01549400  |
| C  | 3.88288500  | -2.55447300 | 0.02775900  |
| C  | 3.21239300  | -1.26094500 | 0.00172300  |
| N  | 1.83120700  | -1.46392600 | -0.00999000 |
| C  | 1.61976900  | -2.84278900 | 0.00022500  |
| H  | 3.04457800  | -4.59463200 | 0.01819100  |
| H  | 4.95235500  | -2.69793300 | 0.05957600  |
| C  | 3.87501900  | -0.00779300 | 0.00542900  |
| N  | -1.08902000 | 1.46606300  | -0.00458900 |
| C  | -0.87651600 | 2.84607300  | 0.00786300  |
| C  | -2.16508900 | 3.52681700  | 0.00567300  |
| C  | -3.14064700 | 2.55869800  | 0.00195900  |
| C  | -2.46896300 | 1.26438400  | -0.01271600 |
| H  | -2.30206600 | 4.59789900  | 0.00467600  |
| H  | -4.21017200 | 2.70717500  | 0.01272600  |
| C  | 3.89573000  | 2.53883200  | -0.01702700 |
| C  | 2.92531100  | 3.51275300  | -0.00954200 |
| C  | 1.63397100  | 2.83840400  | -0.00101500 |
| N  | 1.83848900  | 1.45850200  | 0.01033900  |
| C  | 3.21869200  | 1.24865600  | 0.00576900  |
| H  | 4.96603900  | 2.67697700  | -0.04362100 |
| H  | 3.06749500  | 4.58313800  | -0.01163500 |
| C  | 0.37956800  | 3.49605900  | 0.00466800  |
| C  | 0.35854300  | -4.99906600 | -0.01330400 |
| C  | 0.74821600  | -5.72244400 | 1.13668800  |
| C  | 0.74100700  | -7.12979200 | 1.13801000  |
| C  | 0.34966200  | -7.83736600 | -0.01530700 |
| C  | -0.03716800 | -7.12581300 | -1.16762600 |
| C  | -0.03549800 | -5.71838900 | -1.16431400 |
| H  | 1.04521900  | -5.18011300 | 2.03111000  |
| H  | 1.03721800  | -7.66959600 | 2.03450100  |
| H  | 0.34605500  | -8.92484100 | -0.01598700 |
| H  | -0.33713200 | -7.66246800 | -2.06474600 |
| H  | -0.32908300 | -5.17293700 | -2.05797600 |
| C  | -4.62809500 | 0.01356400  | -0.01716500 |
| C  | -5.34689300 | 0.48164200  | -1.14326800 |

|   |              |             |             |
|---|--------------|-------------|-------------|
| C | -6.74849500  | 0.48296100  | -1.15111900 |
| C | -7.46322800  | 0.02107400  | -0.02346700 |
| C | -6.75798600  | -0.44498100 | 1.10774700  |
| C | -5.35516900  | -0.45038300 | 1.10452200  |
| H | -4.79974400  | 0.82991500  | -2.01491900 |
| H | -7.30293000  | 0.83379700  | -2.01682000 |
| H | -7.31135800  | -0.79376000 | 1.97317100  |
| H | -4.81392700  | -0.80139800 | 1.97880800  |
| C | 0.38348200   | 5.00097100  | 0.00536300  |
| C | 0.78308400   | 5.72204700  | -1.14266200 |
| C | 0.78275900   | 7.12940700  | -1.14443100 |
| C | 0.38851100   | 7.83925000  | 0.00649400  |
| C | -0.00816300  | 7.12997800  | 1.15686900  |
| C | -0.01340800  | 5.72256800  | 1.15396400  |
| H | 1.08221600   | 5.17800200  | -2.03532700 |
| H | 1.08639500   | 7.66745700  | -2.03947800 |
| H | 0.39006600   | 8.92672700  | 0.00676700  |
| H | -0.31056300  | 7.66841500  | 2.05210300  |
| H | -0.31468000  | 5.17882400  | 2.04611200  |
| C | 5.37613400   | -0.01156900 | 0.00900700  |
| C | 6.11063500   | -0.50841400 | -1.09236500 |
| C | 7.51284000   | -0.51029000 | -1.09937700 |
| C | 8.23921800   | -0.01862100 | 0.01554100  |
| C | 7.51019400   | 0.47663500  | 1.12713700  |
| C | 6.10803300   | 0.48167800  | 1.11371800  |
| H | 5.57522900   | -0.88240200 | -1.96198700 |
| H | 8.04895100   | -0.88949100 | -1.96763200 |
| H | 8.04420800   | 0.85326200  | 1.99780300  |
| H | 5.57052400   | 0.85836700  | 1.98087700  |
| C | -8.94412500  | 0.04259400  | -0.06876400 |
| O | -9.63980600  | 0.43603900  | -1.02354200 |
| O | -9.53264900  | -0.43618800 | 1.09969900  |
| H | -10.51261000 | -0.40097700 | 1.02224300  |
| N | 9.63377900   | -0.02194200 | 0.01865800  |
| H | 10.15267700  | -0.37573800 | -0.77030700 |
| H | 10.15083200  | 0.32883100  | 0.81017900  |

### Energies of frontier orbitals of ZnTPP, 2a, 2b, 2c and 2d in eV

|       | HOMO-1 | HOMO  | LUMO  | LUMO+1 | LUMO+2 |
|-------|--------|-------|-------|--------|--------|
| ZnTPP | -5,42  | -5,14 | -2,39 | -2,39  | -0,86  |
| 2a    | -5,77  | -5,51 | -3,20 | -2,74  | -2,72  |
| 2b    | -5,40  | -5,05 | -2,39 | -2,37  | -1,60  |
| 2c    | -5,81  | -5,55 | -3,23 | -2,78  | -2,75  |
| 2d    | -5,44  | -5,09 | -2,43 | -2,40  | -1,76  |

## Normal coordinate structural decomposition (NSD) analysis for 1a, 2a, 3a and CuTPP

NSD analyses of the compounds was accomplished using the web-based NSD program (<http://jasheln.unm.edu/>). The results of the NSD decomposition are given below.

NSD result generated from file 1a.PDB at Tue Apr 10 17:53:41 CEST 2007

Summary of the NSD (in Å):

| basis | Doop   | doop   | B2u     | B1u     | A2u     | Eg(x)   | Eg(y)  | A1u     |
|-------|--------|--------|---------|---------|---------|---------|--------|---------|
| min.  | 0,2588 | 0,0384 | -0,0693 | 0,0741  | -0,0044 | 0,0724  | 0,2267 | -0,0066 |
| ext.  | 0,3416 | 0,0060 | -0,0690 | 0,0741  | -0,0043 | 0,0711  | 0,2350 | -0,0066 |
|       |        |        | 0,0151  | -0,0045 | 0,0021  | -0,0327 | 0,2201 | 0,0005  |
| comp. | 0,3434 | 0,0000 | 0,0709  | 0,0743  | 0,0048  | 0,0846  | 0,3165 | 0,0066  |

NSD result generated from file 2a.PDB at Tue Apr 10 17:47:18 CEST 2007

Summary of the NSD (in Å):

| basis | Doop   | doop   | B2u     | B1u     | A2u    | Eg(x)   | Eg(y)  | A1u    |
|-------|--------|--------|---------|---------|--------|---------|--------|--------|
| min.  | 0,3392 | 0,0210 | -0,2076 | 0,0204  | 0,1238 | -0,2159 | 0,0959 | 0,0200 |
| ext.  | 0,3608 | 0,0032 | -0,2072 | 0,0204  | 0,1240 | -0,2203 | 0,0971 | 0,0200 |
|       |        |        | 0,0225  | -0,0058 | 0,0039 | -0,1172 | 0,0295 | 0,0021 |
| comp. | 0,3613 | 0,0000 | 0,2088  | 0,0212  | 0,1240 | 0,2459  | 0,1011 | 0,0201 |

NSD result generated from file 3a.PDB at Tue Apr 10 17:56:18 CEST 2007

Summary of the NSD (in Å):

| basis | Doop   | doop   | B2u     | B1u    | A2u     | Eg(x)   | Eg(y)  | A1u     |
|-------|--------|--------|---------|--------|---------|---------|--------|---------|
| min.  | 0,9525 | 0,0077 | 0,8607  | 0,3243 | -0,2356 | -0,0511 | 0,0551 | -0,0063 |
| ext.  | 0,9533 | 0,0035 | 0,8601  | 0,3243 | -0,2361 | -0,0516 | 0,0556 | -0,0063 |
|       |        |        | -0,0330 | 0,0024 | -0,0120 | -0,0120 | 0,0136 | -0,0059 |
| comp. | 0,9536 | 0,0000 | 0,8614  | 0,3246 | 0,2359  | 0,0541  | 0,0581 | 0,0086  |

NSD result generated from file CuTPP.PDB at Tue Apr 10 17:43:51 CEST 2007

Summary of the NSD (in Å):

| basis | Doop   | doop   | B2u     | B1u     | A2u    | Eg(x)  | Eg(y)  | A1u    |
|-------|--------|--------|---------|---------|--------|--------|--------|--------|
| min.  | 1,1964 | 0,0185 | -0,1822 | -1,1825 | 0,0000 | 0,0000 | 0,0000 | 0,0000 |
| ext.  | 1,2028 | 0,0056 | -0,1798 | -1,1825 | 0,0000 | 0,0000 | 0,0000 | 0,0000 |
|       |        |        | 0,1239  | -0,0056 | 0,0000 | 0,0000 | 0,0000 | 0,0000 |
| comp. | 1,2033 | 0,0000 | 0,2227  | 1,1825  | 0,0000 | 0,0000 | 0,0000 | 0,0000 |

Full  $^1\text{H}$  and  $^{13}\text{C}$  NMR data tables. $^1\text{H}$  NMR data of **1a** – **1d** and **2a** – **2d** in  $[\text{D}]_8\text{-THF}$  (atom numbering according to Scheme 3)

|                             | <b>1a</b>                                            | <b>1b</b>                                                            | <b>1c</b>                                            | <b>1d</b>                                                            | <b>2a</b>                                                                                                                    | <b>2b</b>                                                                                                                                                                                                                    | <b>2c</b>                                                                                                                                                                                                                    | <b>2d</b>                                            |
|-----------------------------|------------------------------------------------------|----------------------------------------------------------------------|------------------------------------------------------|----------------------------------------------------------------------|------------------------------------------------------------------------------------------------------------------------------|------------------------------------------------------------------------------------------------------------------------------------------------------------------------------------------------------------------------------|------------------------------------------------------------------------------------------------------------------------------------------------------------------------------------------------------------------------------|------------------------------------------------------|
| $\text{NH}_{\text{pyrrol}}$ | -2.72 (s, 2H)                                        | -2.66 (s, 2H)                                                        | -2.72 (s, 2H)                                        | -2.67 (s, 2H)                                                        | –                                                                                                                            | –                                                                                                                                                                                                                            | –                                                                                                                                                                                                                            | –                                                    |
| $\text{NH}_2$               | –                                                    | 5.00 (br.s, 2H)                                                      | –                                                    | 5.04 (br.s, 2H)                                                      | –                                                                                                                            | 4.88 (br.s)                                                                                                                                                                                                                  | –                                                                                                                                                                                                                            | 5.35 (br.s)                                          |
| $\text{CH}_3$               | 4.04 (s, 3H)                                         | 4.04 (s, 3H)                                                         | –                                                    | –                                                                    | 4.04 (s, 3H)                                                                                                                 | 4.04 (s, 3H)                                                                                                                                                                                                                 | –                                                                                                                                                                                                                            | –                                                    |
| $5_2$                       | 8.45 (d, 2H,<br>$^3J_{\text{HH}} = 8.5 \text{ Hz}$ ) | 7.88 (d, 2H,<br>$^3J_{\text{HH}} = 8.3 \text{ Hz}$ )                 | 8.46 (d, 2H,<br>$^3J_{\text{HH}} = 8.4 \text{ Hz}$ ) | 7.87 (d, 2H,<br>$^3J_{\text{HH}} = 8.2 \text{ Hz}$ )                 | 8.43 (d, 2H,<br>$^3J_{\text{HH}} = 8.6 \text{ Hz}$ )                                                                         | 7.86 (d, 2H,<br>$^3J_{\text{HH}} = 6.7 \text{ Hz}$ )                                                                                                                                                                         | 8.43 (d, 2H,<br>$^3J_{\text{HH}} = 8.5 \text{ Hz}$ )                                                                                                                                                                         | 7.99 (d, 2H,<br>$^3J_{\text{HH}} = 8.2 \text{ Hz}$ ) |
| $5_3$                       | 8.66 (d, 2H,<br>$^3J_{\text{HH}} = 8.5 \text{ Hz}$ ) | 6.99 (d, 2H,<br>$^3J_{\text{HH}} = 8.3 \text{ Hz}$ )                 | 8.67 (d, 2H,<br>$^3J_{\text{HH}} = 8.4 \text{ Hz}$ ) | 6.99 (d, 2H,<br>$^3J_{\text{HH}} = 8.2 \text{ Hz}$ )                 | 8.64 (d, 2H,<br>$^3J_{\text{HH}} = 8.6 \text{ Hz}$ )                                                                         | 6.95 (d, 2H,<br>$^3J_{\text{HH}} = 6.7 \text{ Hz}$ )                                                                                                                                                                         | 8.64 (d, 2H,<br>$^3J_{\text{HH}} = 8.5 \text{ Hz}$ )                                                                                                                                                                         | 7.24 (d, 2H,<br>$^3J_{\text{HH}} = 8.2 \text{ Hz}$ ) |
| $15_2$                      | 8.32 (d, 2H,<br>$^3J_{\text{HH}} = 8.0 \text{ Hz}$ ) | 8.31 (d, 2H,<br>$^3J_{\text{HH}} = 8.1 \text{ Hz}$ )                 | 8.29 (d, 2H,<br>$^3J_{\text{HH}} = 7.8 \text{ Hz}$ ) | 8.26 (d, 2H,<br>$^3J_{\text{HH}} = 7.8 \text{ Hz}$ )                 | 8.30 (d, 2H,<br>$^3J_{\text{HH}} = 8.1 \text{ Hz}$ )                                                                         | 8.30 (d, 2H,<br>$^3J_{\text{HH}} = 8.0 \text{ Hz}$ )                                                                                                                                                                         | 8.28 (d, 2H,<br>$^3J_{\text{HH}} = 8.0 \text{ Hz}$ )                                                                                                                                                                         | 8.30 (m, 2H)                                         |
| $15_3$                      | 8.44 (d, 2H,<br>$^3J_{\text{HH}} = 8.0 \text{ Hz}$ ) | 8.42 (d, 2H,<br>$^3J_{\text{HH}} = 8.1 \text{ Hz}$ )                 | 8.45 (d, 2H,<br>$^3J_{\text{HH}} = 7.8 \text{ Hz}$ ) | 8.47 (d, 2H,<br>$^3J_{\text{HH}} = 7.8 \text{ Hz}$ )                 | 8.41 (d, 2H,<br>$^3J_{\text{HH}} = 8.1 \text{ Hz}$ )                                                                         | 8.39 (d, 2H,<br>$^3J_{\text{HH}} = 8.0 \text{ Hz}$ )                                                                                                                                                                         | 8.42 (d, 2H,<br>$^3J_{\text{HH}} = 8.0 \text{ Hz}$ )                                                                                                                                                                         | 8.42 (m, 2H)                                         |
| $10_2/20_2$                 | 8.19 (m, 4H)                                         | 8.20 (m, 4H)                                                         | 8.20 (m, 4H)                                         | 8.16 (m, 4H)                                                         | 8.19 (m, 4H)                                                                                                                 | 8.19 (m, 4H)                                                                                                                                                                                                                 | 8.18 (m, 4H)                                                                                                                                                                                                                 | 8.20 (m, 4H)                                         |
| $10_3/20_3/$<br>$10_4/20_4$ | 7.77 (m, 6H)                                         | 7.76 (m, 6H)                                                         | 7.77 (m, 6H)                                         | 7.72 (m, 6H)                                                         | 7.74 (m, 6H)                                                                                                                 | 7.73 (m, 6H)                                                                                                                                                                                                                 | 7.74 (m, 6H)                                                                                                                                                                                                                 | 7.76 (m, 6H)                                         |
| $2,3,7,8,12,$<br>$13,17,18$ | 8.78-8.83 (m,<br>4H)                                 | 8.78 (m, 6H)<br>8.96 (d, 2H,<br>$^3J_{\text{HH}} = 4.6 \text{ Hz}$ ) | 8.84 (m, 8H)                                         | 8.78 (m, 6H)<br>8.95 (d, 2H,<br>$^3J_{\text{HH}} = 4.5 \text{ Hz}$ ) | 8.81 (m, 4H)<br>8.86 (d, 2H,<br>$^3J_{\text{HH}} = 4.6 \text{ Hz}$ )<br>8.88 (d, 2H,<br>$^3J_{\text{HH}} = 4.6 \text{ Hz}$ ) | 8.77 (d, 2H,<br>$^3J_{\text{HH}} = 4.5 \text{ Hz}$ )<br>8.80 (d, 2H,<br>$^3J_{\text{HH}} = 4.5 \text{ Hz}$ )<br>8.83 (d, 2H,<br>$^3J_{\text{HH}} = 4.5 \text{ Hz}$ )<br>8.98 (d, 2H,<br>$^3J_{\text{HH}} = 4.5 \text{ Hz}$ ) | 8.81 (d, 2H,<br>$^3J_{\text{HH}} = 4.6 \text{ Hz}$ )<br>8.84 (d, 2H,<br>$^3J_{\text{HH}} = 4.6 \text{ Hz}$ )<br>8.87 (d, 2H,<br>$^3J_{\text{HH}} = 4.6 \text{ Hz}$ )<br>8.89 (d, 2H,<br>$^3J_{\text{HH}} = 4.6 \text{ Hz}$ ) | 8.89 (m, 8H)                                         |

 $^{13}\text{C}$  NMR data of **1a** – **1d** and **2a** – **2d** in  $[\text{D}]_8\text{-THF}$  (atom numbering according to Scheme 3)

|                             | <b>1a</b> | <b>1b</b> | <b>1c</b> | <b>1d</b> | <b>2a</b> | <b>2b</b> | <b>2c</b> | <b>2d</b> |
|-----------------------------|-----------|-----------|-----------|-----------|-----------|-----------|-----------|-----------|
| $\text{CH}_3$               | 52.2 (s)  | 51.9 (s)  | –         | –         | 52.2 (s)  | 52.2 (s)  | –         | –         |
| $\text{CO}$                 | 167.0 (s) | 167.3 (s) | 167.6 (s) | 169.6 (s) | 167.0 (s) | 167.3 (s) | 168.9 (s) | 167.4 (s) |
| $5$                         | 118.4 (s) | 122.8 (s) | 121.4 (s) | 120.7 (s) | 118.9 (s) | 123.1 (s) | 118.5 (s) | 124.2 (s) |
| $5_1$                       | 149.5 (s) | 130.6 (s) | 149.6 (s) | 128.9 (s) | 149.9 (s) | 132.0 (s) | 150.3 (s) | 140.5 (s) |
| $5_2$                       | 135.3 (s) | 136.1 (s) | 135.9 (s) | 136.3 (s) | 135.8 (s) | 136.2 (s) | 135.7 (s) | 135.5 (s) |
| $5_3$                       | 122.5 (s) | 112.9 (s) | 122.3 (s) | 113.0 (s) | 122.0 (s) | 112.7 (s) | 122.1 (s) | 119.1 (s) |
| $5_4$                       | 148.9 (s) | 149.7 (s) | 148.5 (s) | 143.4 (s) | 148.6 (s) | 148.7 (s) | 148.6 (s) | 150.9 (s) |
| $15$                        | 120.2 (s) | 118.3 (s) | 120.8 (s) | 119.8 (s) | 120.2 (s) | 119.2 (s) | 120.8 (s) | 119.7 (s) |
| $15_1$                      | 147.7 (s) | 148.0 (s) | 147.4 (s) | 142.2 (s) | 148.8 (s) | 149.5 (s) | 148.4 (s) | 148.7 (s) |
| $15_2$                      | 135.3 (s) | 134.9 (s) | 135.3 (s) | 134.9 (s) | 135.2 (s) | 135.2 (s) | 135.0 (s) | 134.9 (s) |
| $15_3$                      | 128.5 (s) | 128.1 (s) | 128.6 (s) | 128.5 (s) | 127.9 (s) | 128.0 (s) | 128.1 (s) | 128.0 (s) |
| $15_4$                      | 130.8 (s) | 130.4 (s) | 131.6 (s) | 131.3 (s) | 130.3 (s) | 130.0 (s) | 131.2 (s) | 130.7 (s) |
| $10/20$                     | 121.3 (s) | 120.9 (s) | 121.4 (s) | 123.0 (s) | 121.9 (s) | 121.7 (s) | 121.7 (s) | 121.6 (s) |
| $10_1/20_1$                 | 142.6 (s) | 143.4 (s) | 142.8 (s) | 141.9 (s) | 143.8 (s) | 144.5 (s) | 144.2 (s) | 144.4 (s) |
| $10_2/20_2$                 | 135.3 (s) | 135.2 (s) | 134.9 (s) | 135.1 (s) | 134.9 (s) | 135.2 (s) | 135.0 (s) | 134.9 (s) |
| $10_3/20_3$                 | 127.4 (s) | 127.5 (s) | 127.5 (s) | 127.4 (s) | 127.0 (s) | 127.1 (s) | 127.1 (s) | 126.5 (s) |
| $10_4/20_4$                 | 128.6 (s) | 128.5 (s) | 128.8 (s) | 128.5 (s) | 128.1 (s) | 128.3 (s) | 128.0 (s) | 128.2 (s) |
| $2,3,7,8,12,$<br>$13,17,18$ | 131.1 (s) | 131.2 (s) | n.o.      | 131.0 (s) | 131.5 (s) | 131.3 (s) | 131.4 (s) | 131.5 (s) |
|                             |           |           |           |           | 132.6 (s) | 131.7 (s) | 132.1 (s) | 131.8 (s) |
|                             |           |           |           |           | 132.8 (s) | 132.0 (s) | 132.3 (s) | 131.9 (s) |
|                             |           |           |           |           |           | 132.6 (s) | 132.6 (s) | 132.5 (s) |
| $1,4,6,9,11,$<br>$14,16,19$ | n.o.      | n.o.      | n.o.      | n.o.      | 150.3 (s) | 150.1 (s) | 149.9 (s) | 150.5 (s) |
|                             |           |           |           |           | 150.7 (s) | 150.8 (s) | 150.1 (s) | 150.6 (s) |
|                             |           |           |           |           | 151.4 (s) | 151.0 (s) | 150.3 (s) | 151.0 (s) |
|                             |           |           |           |           | 151.5 (s) | 151.4 (s) | 150.7 (s) | 151.1 (s) |
